# Supplementary material for: Camera trapping for small mammals: the case of a non- native shrew
Source: Research Square preprint supplement (doi:10.21203/rs.3.rs-7083063/v1), 2025-10-29
Supplement: Supplementary file 1 [file 73eb81dedb2acd1c5748d9d5.xlsx]

## Sheet: citation
UID	Name	DOI	Citation	Rights	More Information	Data generalisations	Information withheld	Download limit	Number of Records in Download
dp35	People's Trust for Endangered Species		Records provided by People's Trust for Endangered Species, accessed through NBN Atlas website.		For more information: email enquiries@ptes.org, or https://registry.nbnatlas.org/public/show/dp35				70
dp77	Biological Records Centre		Records provided by Biological Records Centre, accessed through NBN Atlas website.		For more information: email brc@ceh.ac.uk, or https://registry.nbnatlas.org/public/show/dp77				103
dp8	Mammal Society		Records provided by Mammal Society, accessed through NBN Atlas website.		For more information: email atlas@themammalsociety.org, or https://registry.nbnatlas.org/public/show/dp8				287
dr1574	ERIC NE Combined dataset to 2017		Environmental Records Information Centre North East ([Insert download year]). ERIC NE Combined dataset to 2017. Occurrence dataset on the NBN Atlas	Creative Commons, with Attribution, Non-commercial v4.0 (CC-BY-NC)	For more information: https://registry.nbnatlas.org/public/show/dr1574		ERIC NE Data holdings metadata avaialble at http://www.ericnortheast.org.uk/geisha/assets/images/ERIC-NE-Species-metadata.2.pdf		1218
dr2451	Mammal Mapper App Sighting Records	10.15468/mjw32e	Mammal Society [date of download] Mammal Mapper App Sighting Records	Creative Commons with Attribution 4.0 (CC-BY) CC BY Creative Commons Attribution	For more information: email atlas@themammalsociety.org, or https://registry.nbnatlas.org/public/show/dr2451				50
dr2331	Non-avian taxa (BTO/JNCC/RSPB partnership)		Records provided by BTO, accessed through NBN Atlas website	Open Government Licence (OGL)	For more information: https://registry.nbnatlas.org/public/show/dr2331				29
dr2930	MammalWeb records	10.15468/se5ad5	Hsing, P.-Y., Hill, R. A., Smith, G. C., Bradley, S., Green, S. E., Kent, V. T., Mason, S. S., Rees, J., Whittingham, M. J., Cokill, J., MammalWeb citizen scientists & Stephens, P. A. (2022). Large-scale mammal monitoring: The potential of a citizen science camera-trapping project in the United Kingdom. Ecological Solutions and Evidence, 3, e12180. https://doi.org/10.1002/2688-8319.12180	Creative Commons, with Attribution, Non-commercial v4.0 (CC-BY-NC)	For more information: https://registry.nbnatlas.org/public/show/dr2930				2827
dr2677	Collection Specimens	https://doi.org/10.5519/0002965	Natural History Museum (2023). Data Portal query on 1 resources https://doi.org/10.5519/qd.i4tk4lrk	Creative Commons Zero v1.0 (CC0) CC0-1.0	For more information: email data@nhm.ac.uk, or https://registry.nbnatlas.org/public/show/dr2677				1
dp199	Environmental Records Information Centre North East		Records provided by Environmental Records Information Centre North East, accessed through NBN Atlas website.		For more information: email eric.ne@twmuseums.org.uk, or https://registry.nbnatlas.org/public/show/dp199				1218
dp277	MammalWeb		Records provided by MammalWeb, accessed through NBN Atlas website.		For more information: https://registry.nbnatlas.org/public/show/dp277				2827
dp266	Natural History Museum, London		Records provided by Natural History Museum, London, accessed through NBN Atlas website.		For more information: https://registry.nbnatlas.org/public/show/dp266				1
dp267	iSpot		Records provided by iSpot, accessed through NBN Atlas website.		For more information: https://registry.nbnatlas.org/public/show/dp267				5
dr2701	iSpot British Isles observations	10.15468/uqdj62	iSpot ([Insert download year]). iSpot British Isles observations. Occurrence dataset on the NBN Atlas	Creative Commons, with Attribution, Non-commercial v4.0 (CC-BY-NC)	For more information: https://registry.nbnatlas.org/public/show/dr2701				5
dr671	National Mammal Atlas Project, online recording	doi:10.15468/i2eosa	National Mammal Atlas Project, online recording ([year of download])	Creative Commons, with Attribution, Non-commercial v4.0 (CC-BY-NC) CC BY-NC Creative Commons Attribution Non-Commercial	For more information: https://registry.nbnatlas.org/public/show/dr671				237
dr815	Protected and Invasive Species Records Collected Through Environment Agency Survey 1995 - 2021	doi:10.15468/awfvnp	Environment Agency ([Insert year of upload]). Protected and Invasive Species Records Collected Through Environment Agency Survey 1995 - 2021. Occurrence dataset on the NBN Atlas	Open Government Licence (OGL) OGL	For more information: email marina.flamank@environment-agency.gov.uk, or https://registry.nbnatlas.org/public/show/dr815				36
dr227	Living with Mammals survey	doi:10.15468/kv7kgm	People's Trust for Endangered Species ([Insert download year]). Living with Mammals survey. Occurrence dataset on the NBN Atlas	Creative Commons, with Attribution, Non-commercial v4.0 (CC-BY-NC) CC-BY-NC	For more information: email emily.thomas@ptes.org, or https://registry.nbnatlas.org/public/show/dr227		Further details and reports from the survey can be found at www.ptes.org/lwm		57
dp29	British Trust for Ornithology		Records provided by British Trust for Ornithology, accessed through NBN Atlas website.		For more information: email info@bto.org, or https://registry.nbnatlas.org/public/show/dp29				29
dr953	National Water Vole Monitoring Programme (NWVMP)	doi:10.15468/l5l7yp	People's Trust for Endangered Species ([Insert download year]). National Water Vole Monitoring Programme (NWVMP). Occurrence dataset on the NBN Atlas	Creative Commons, with Attribution, Non-commercial v4.0 (CC-BY-NC) CC-BY-NC	For more information: email emily.thomas@ptes.org, or https://registry.nbnatlas.org/public/show/dr953	The NWVMP started in 2015 and is ongoing. Most surveys take place in May and should have a full date (DD/MM/YYYY). Some sites are surveyed again later in the summer (September/October).	Access to this dataset is restricted for the following reasons; The water vole is a protected species that is vulnerable to habitat fragmentation, human disturbance or prejudice. At this time the data provider believes that full disclosure to the public could lead to environmental harm. This sensitive information may be made available under licence to specific organisations and individuals that n…		13
dr743	Mammal records from Britain from the Atlas of Mammals (1993), with some subsequent records	doi:10.15468/1qyxis	Biological Records Centre ([Insert download year]). Mammal records from Britain from the Atlas of Mammals (1993), with some subsequent records. Occurrence dataset on the NBN Atlas	Creative Commons with Attribution 4.0 (CC-BY) CC-BY	For more information: email brc@ceh.ac.uk, or https://registry.nbnatlas.org/public/show/dr743				103
dp138	Environment Agency		Records provided by Environment Agency, accessed through NBN Atlas website.		For more information: email enquiries@environment-agency.gov.uk, or https://registry.nbnatlas.org/public/show/dp138				36
