# Supplementary material for: Camera trapping for small mammals: the case of a non- native shrew
Source: Research Square preprint supplement (doi:10.21203/rs.3.rs-7083063/v1), 2025-10-29
Supplement: Supplementary file 2 [file 9b3e55d6575a690522366aa5.docx]

Supplementary information: Model selection tables for *Apodemus sylvaticus, Myodes glareolus, Sorex minutus, Sorex Araneus,* and *Microtus agrestis* (Hbt = habitat type, bat = bait type, srv_prd = survey period). Models used for inference highlighted in bold, and models within 6 ΔAIC of best model that were ignored due to being expanded versions of best model italicised.

| ***Apodemus sylvaticus*, wood mouse** | | | | | | | | | | | |
| --- | --- | --- | --- | --- | --- | --- | --- | --- | --- | --- | --- |
|  | psi(Int) | psi(Hbt) | p(Int) | p(bat) | p(srv_prd) | p(bat:srv_prd) | df | logLik | AICc | delta | weight |
| **15** | **3.972** |  | **6.183** | **+** | **-1.105** | **+** | **9** | **-200.643** | **421.1** | **0** | **0.808** |
| *16* | *13.81* | *+* | *6.185* | *+* | *-1.105* | *+* | *11* | *-199.824* | *424.4* | *3.28* | *0.157* |
| 5 | 3.97 |  | 5.135 |  | -0.9408 |  | 3 | -210.993 | 428.2 | 7.09 | 0.023 |
| 6 | 9.237 | + | 5.135 |  | -0.9408 |  | 5 | -210.175 | 430.9 | 9.81 | 0.006 |
| 7 | 3.969 |  | 5.467 | + | -0.9484 |  | 6 | -209.391 | 431.6 | 10.49 | 0.004 |
| 8 | 12.26 | + | 5.464 | + | -0.9479 |  | 8 | -208.571 | 434.6 | 13.47 | 0.001 |
| 1 | 3.978 |  | 1.1 |  |  |  | 2 | -361.128 | 726.4 | 305.25 | 0 |
| 2 | 9.324 | + | 1.1 |  |  |  | 4 | -360.315 | 729 | 307.9 | 0 |
| 3 | 3.983 |  | 1.229 | + |  |  | 5 | -360.67 | 731.9 | 310.8 | 0 |
| 4 | 11.35 | + | 1.228 | + |  |  | 7 | -359.858 | 734.8 | 313.71 | 0 |

| ***Myodes glareolus*, bank vole** | | | | | | | | | | | |
| --- | --- | --- | --- | --- | --- | --- | --- | --- | --- | --- | --- |
|  | psi(Int) | psi(Hbt) | p(Int) | p(bat) | p(srv_prd) | p(bat:srv_prd) | df | logLik | AICc | delta | weight |
| **5** | **1.61** |  | **3.505** |  | **-0.6004** |  | **3** | **-259.742** | **525.7** | **0** | **0.588** |
| *6* | *1.099* | *+* | *3.505* |  | *-0.6004* |  | *5* | *-258.801* | *528.2* | *2.48* | *0.171* |
| *7* | *1.611* |  | *3.377* | *+* | *-0.606* |  | *6* | *-257.986* | *528.8* | *3.09* | *0.126* |
| *15* | *1.61* |  | *3.1* | *+* | *-0.5343* | *+* | *9* | *-255.084* | *530* | *4.29* | *0.069* |
| *8* | *1.1* | *+* | *3.377* | *+* | *-0.6061* |  | *8* | *-257.045* | *531.5* | *5.83* | *0.032* |
| 16 | 1.1 | + | 3.099 | + | -0.5342 | + | 11 | -254.143 | 533 | 7.32 | 0.015 |
| 1 | 1.622 |  | 1.036 |  |  |  | 2 | -349.851 | 703.8 | 178.1 | 0 |
| 2 | 1.116 | + | 1.037 |  |  |  | 4 | -348.946 | 706.3 | 180.56 | 0 |
| 3 | 1.622 |  | 0.9137 | + |  |  | 5 | -348.728 | 708 | 182.33 | 0 |
| 4 | 1.117 | + | 0.9138 | + |  |  | 7 | -347.824 | 710.8 | 185.05 | 0 |

| ***Sorex minutus*, pygmy shrew** | | | | | | | | | | | |
| --- | --- | --- | --- | --- | --- | --- | --- | --- | --- | --- | --- |
|  | psi(Int) | psi(Hbt) | p(Int) | p(bat) | p(srv_prd) | p(bat:srv_prd) | df | logLik | AICc | delta | weight |
| **5** | **0.2164** |  | **0.7787** |  | **-0.2747** |  | **3** | **-283.519** | **573.3** | **0** | **0.688** |
| *6* | *0.6112* | *+* | *0.7753* |  | *-0.274* |  | *5* | *-282.732* | *576.1* | *2.78* | *0.171* |
| *7* | *0.2231* |  | *0.9469* | *+* | *-0.2759* |  | *6* | *-282.06* | *577* | *3.68* | *0.109* |
| 8 | 0.6086 | + | 0.9426 | + | -0.2753 |  | 8 | -281.289 | 580 | 6.76 | 0.023 |
| 15 | 0.221 |  | 0.5636 | + | -0.1679 | + | 9 | -281.366 | 582.6 | 9.3 | 0.007 |
| 16 | 0.6085 | + | 0.5573 | + | -0.167 | + | 11 | -280.592 | 585.9 | 12.67 | 0.001 |
| 1 | 0.3387 |  | -0.2946 |  |  |  | 2 | -308.598 | 621.3 | 48.04 | 0 |
| 2 | 1.11 | + | -0.2979 |  |  |  | 4 | -306.719 | 621.8 | 48.56 | 0 |
| 3 | 0.3494 |  | -0.1759 | + |  |  | 5 | -307.481 | 625.5 | 52.28 | 0 |
| 4 | 1.128 | + | -0.1809 | + |  |  | 7 | -305.591 | 626.3 | 53.03 | 0 |

| ***Sorex araneus*, common shrew** | | | | | | | | | | | |
| --- | --- | --- | --- | --- | --- | --- | --- | --- | --- | --- | --- |
|  | psi(Int) | psi(Hbt) | p(Int) | p(bat) | p(srv_prd) | p(bat:srv_prd) | df | logLik | AICc | delta | weight |
| **6** | **0.9278** | **+** | **2.048** |  | **-0.5784** |  | **5** | **-260.051** | **530.7** | **0** | **0.853** |
| **5** | **0.2444** |  | **2.05** |  | **-0.5789** |  | **3** | **-264.709** | **535.6** | **4.96** | **0.072** |
| *8* | *0.9334* | *+* | *2.097* | *+* | *-0.5881* |  | *8* | *-259.183* | *535.8* | *5.13* | *0.066* |
| 7 | 0.2454 |  | 2.104 | + | -0.5887 |  | 6 | -263.855 | 540.5 | 9.85 | 0.006 |
| 16 | 0.9354 | + | 2.624 | + | -0.7445 | + | 11 | -258.574 | 541.9 | 11.21 | 0.003 |
| 15 | 0.2458 |  | 2.633 | + | -0.7463 | + | 9 | -263.245 | 546.3 | 15.64 | 0 |
| 2 | 1.044 | + | 0.02094 |  |  |  | 4 | -303.303 | 615 | 84.3 | 0 |
| 1 | 0.2857 |  | 0.02438 |  |  |  | 2 | -308.083 | 620.3 | 89.59 | 0 |
| 4 | 1.049 | + | 0.08779 | + |  |  | 7 | -303.089 | 621.3 | 90.61 | 0 |
| 3 | 0.2856 |  | 0.1024 | + |  |  | 5 | -307.876 | 626.3 | 95.65 | 0 |

| **Field vole** | | | | | | | | | | | |
| --- | --- | --- | --- | --- | --- | --- | --- | --- | --- | --- | --- |
|  | psi(Int) | psi(Hbt) | p(Int) | p(bat) | p(srv_prd) | p(bat:srv_prd) | df | logLik | AICc | delta | weight |
| **6** | **-0.2656** | **+** | **0.4225** |  | **-0.3974** |  | **5** | **-161.861** | **334.3** | **0** | **0.738** |
| **5** | **-0.6703** |  | **0.423** |  | **-0.3976** |  | **3** | **-165.319** | **336.9** | **2.56** | **0.205** |
| 8 | -0.2623 | + | 0.711 | + | -0.3979 |  | 8 | -161.538 | 340.5 | 6.22 | 0.033 |
| 7 | -0.6761 |  | 0.6987 | + | -0.3986 |  | 6 | -165.025 | 342.9 | 8.57 | 0.01 |
| 16 | -0.2778 | + | 0.3387 | + | -0.2748 | + | 11 | -159.069 | 342.9 | 8.58 | 0.01 |
| 15 | -0.6831 |  | 0.3309 | + | -0.2767 | + | 9 | -162.551 | 344.9 | 10.63 | 0.004 |
| 2 | -0.1055 | + | -0.9384 |  |  |  | 4 | -176.152 | 360.7 | 26.38 | 0 |
| 1 | -0.604 |  | -0.9274 |  |  |  | 2 | -179.772 | 363.7 | 29.35 | 0 |
| 4 | -0.1055 | + | -0.4849 | + |  |  | 7 | -175.046 | 365.2 | 30.9 | 0 |
| 3 | -0.6147 |  | -0.4822 | + |  |  | 5 | -178.694 | 368 | 33.67 | 0 |
